# Supplementary material for: Biginelli Reaction Synthesis of Novel Multitarget-Directed Ligands with Ca2+ Channel Blocking Ability, Cholinesterase Inhibition, Antioxidant Capacity, and Nrf2 Activation
Source: MDPI journal article supplement (doi:10.3390/molecules28010071), 2022-12-22

SUPPORTING INFORMATION

# Biginelli Reaction Synthesis of Novel Multitarget-Directed Ligands with Ca<sup>2+</sup> Channel Blocking Ability, Cholinesterase Inhibition, Antioxidant Capacity, and Nrf2 Activation

Rim Malek <sup>1,2</sup>, Alexey Simakov <sup>3</sup>, Audrey Davis <sup>4</sup>, Maciej Maj <sup>5</sup>, Paul J. Bernard <sup>1</sup>, Artur Wnorowski <sup>5</sup>,  
Helene Martin <sup>3</sup>, José Marco-Contelles <sup>6</sup>, Fakher Chabchoub <sup>2</sup>, Patrick Dallemagne <sup>4</sup>, Christophe Rochais <sup>4</sup>, Krzysztof Jozwiak <sup>5</sup> and Lhassane Ismaili <sup>1,\*</sup>

<sup>1</sup> Laboratoire LINC UR 481, Pôle de Chimie Médicinale, Univ. Franche-Comté, UFR Santé, 19, rue Ambroise Paré, F-25000 Besançon, France

<sup>2</sup> Laboratory of Applied Chemistry: Heterocycles, Lipids and Polymers, Faculty of Sciences of Sfax  
University of Sfax, B. P 802, Sfax 3000, Tunisia; fakher.chabchoub@fss.usf.tn

<sup>3</sup> PEPITE EA4267, Univ. Franche-Comté, F-25000 Besançon, France

<sup>4</sup> Centre d'Etudes et de Recherche sur le Médicament de Normandie, Normandie Univ, Unicaen, CERMN, 14000 Caen, France

<sup>5</sup> Department of Biopharmacy, Medical University of Lublin, ul. W. Chodzki 4a, 20-093 Lublin, Poland

<sup>6</sup> Laboratory of Medicinal Chemistry (IQOG, CSIC) C/ Juan de la Cierva 3, 28006 Madrid, Spain

\* Correspondence: lhassane.ismaili@univ-fcomte.fr

Table of Contents

Spectroscopic data of compounds 4a-d and 5a-d.

Figure S1: <sup>1</sup>H NMR spectrum of compound 4a

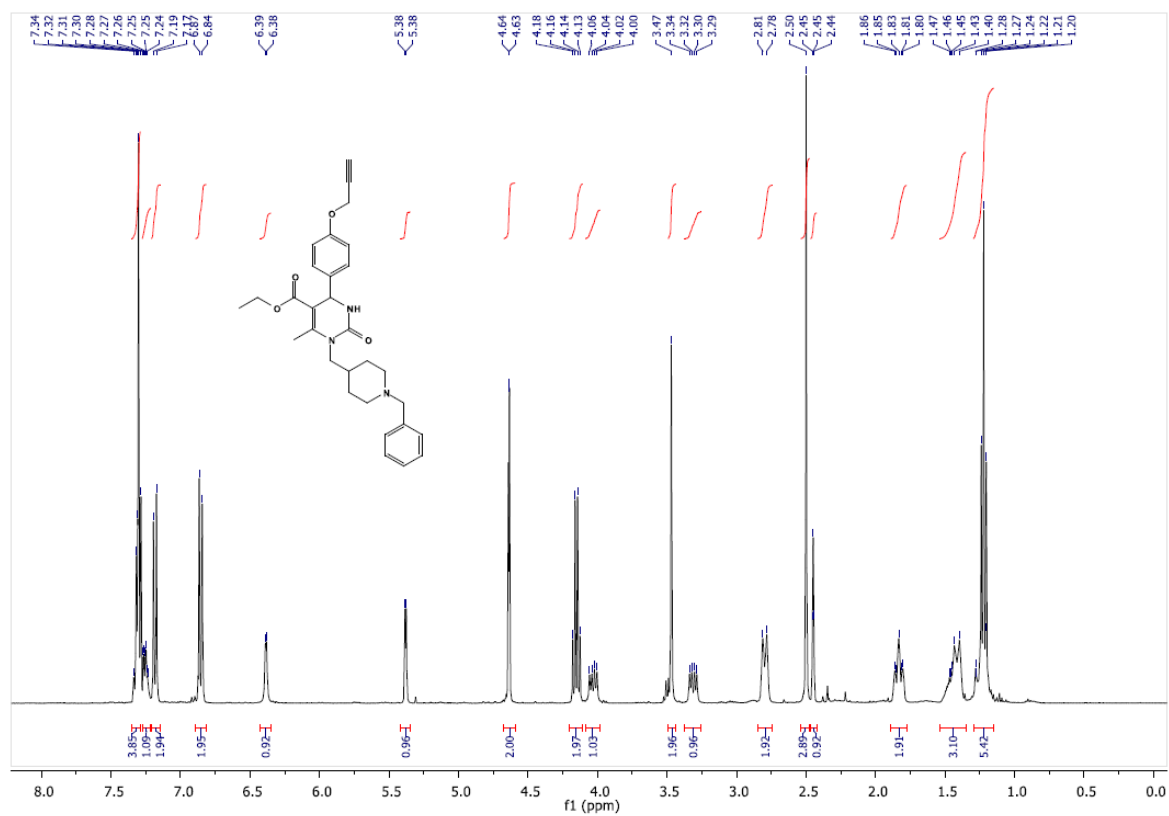

Figure S2: <sup>13</sup>C NMR spectrum of compound 4a

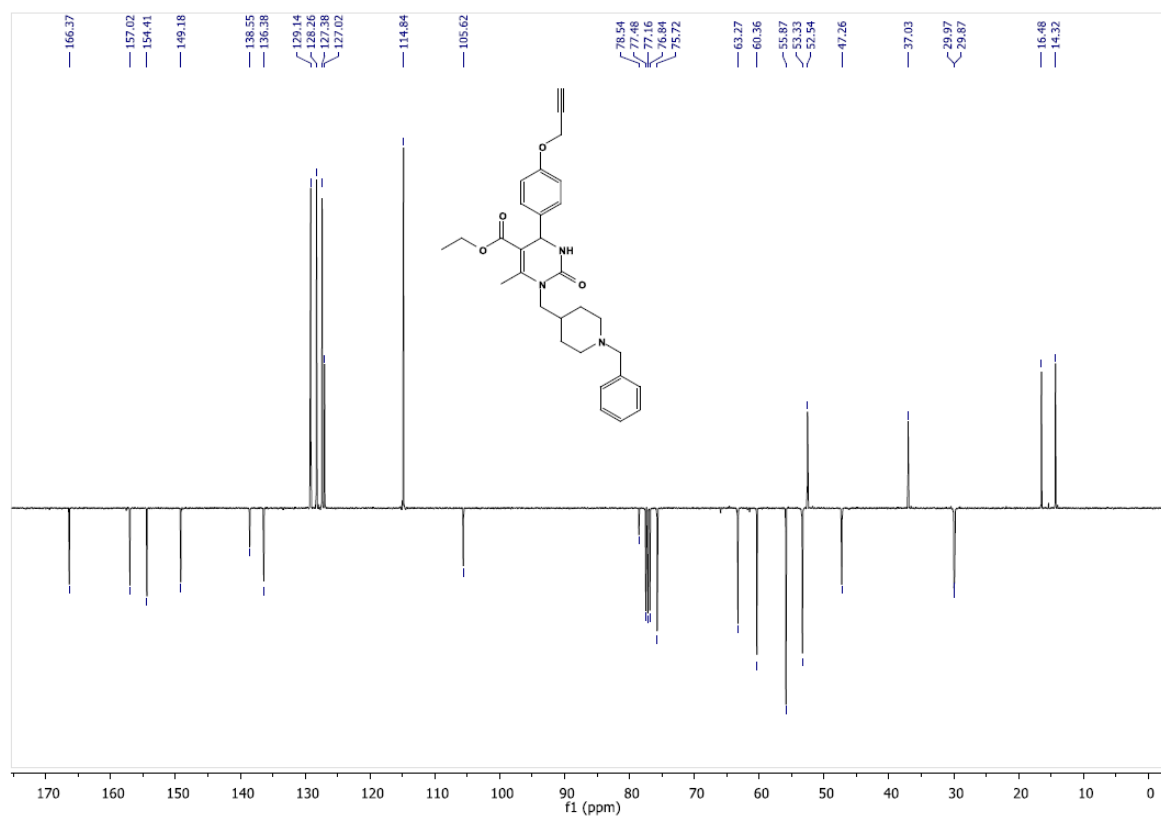

Figure S3:  $^1\text{H}$  NMR spectrum of compound 5a

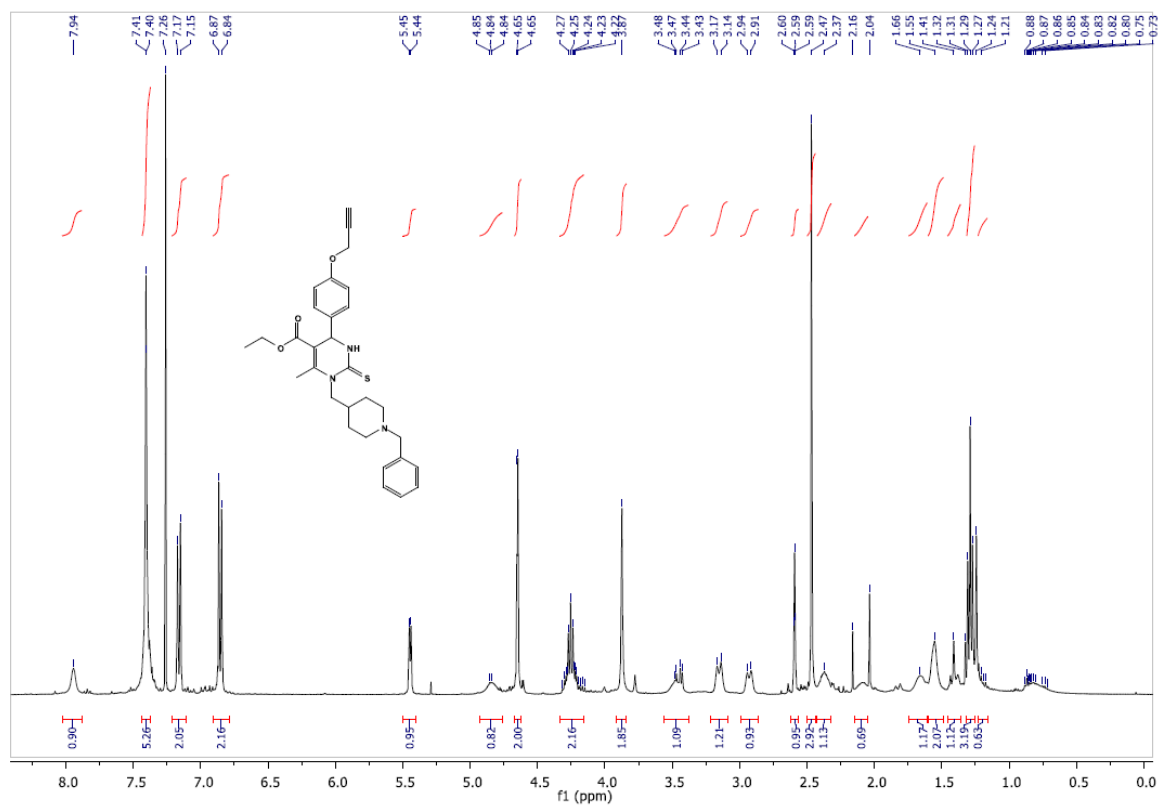

Figure S4:  $^{13}\text{C}$  NMR spectrum of compound 5a

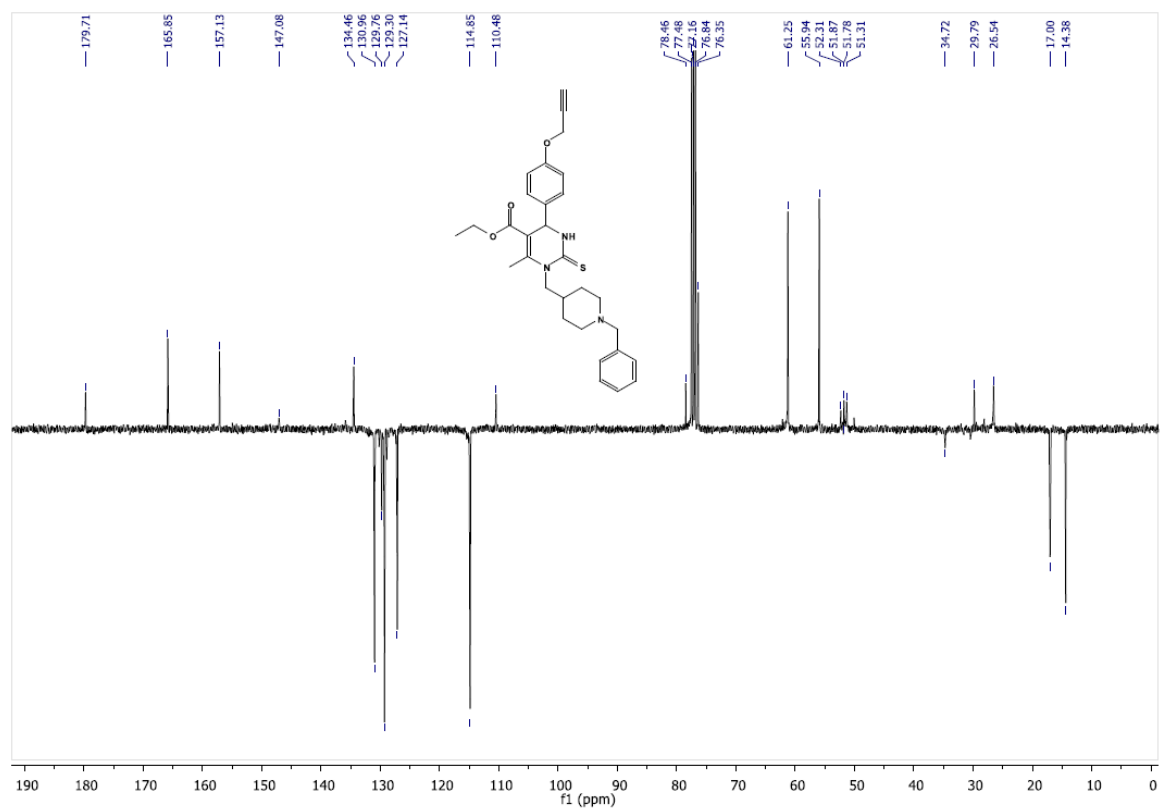

Figure S5:  $^1\text{H}$  NMR spectrum of compound 4b

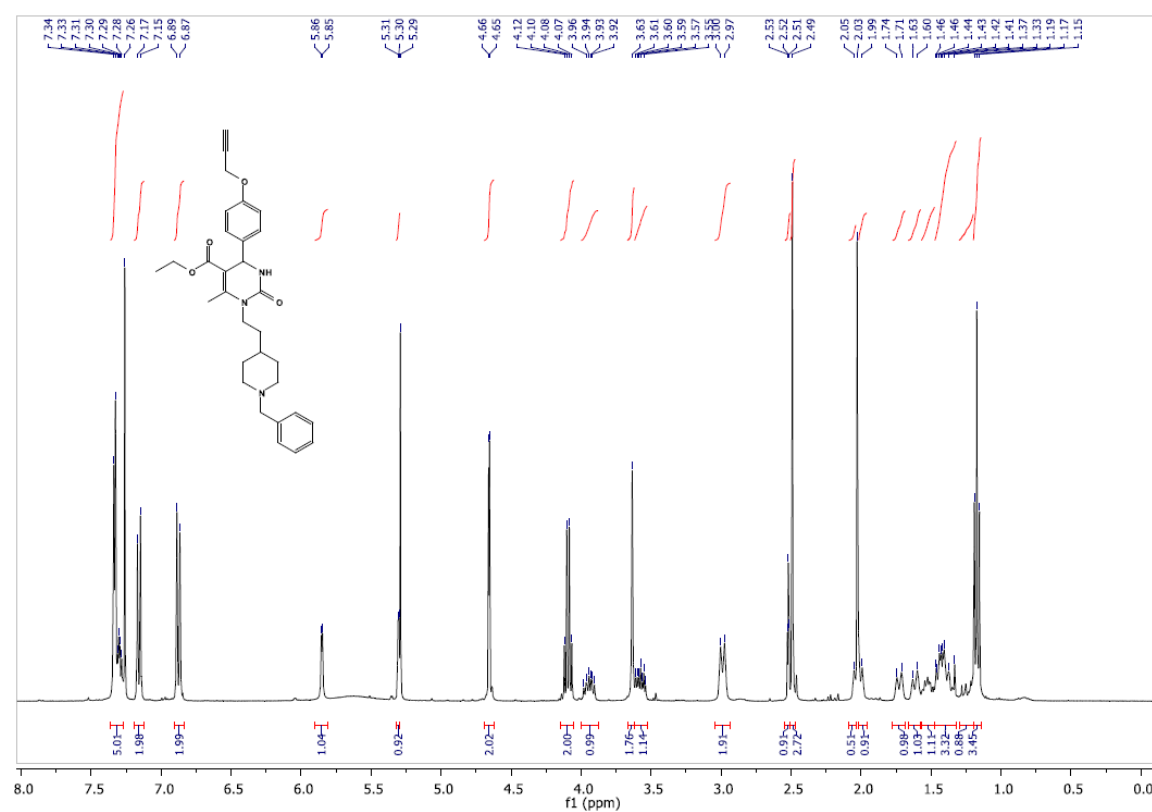

Figure S6:  $^{13}\text{C}$  NMR spectrum of compound 4b

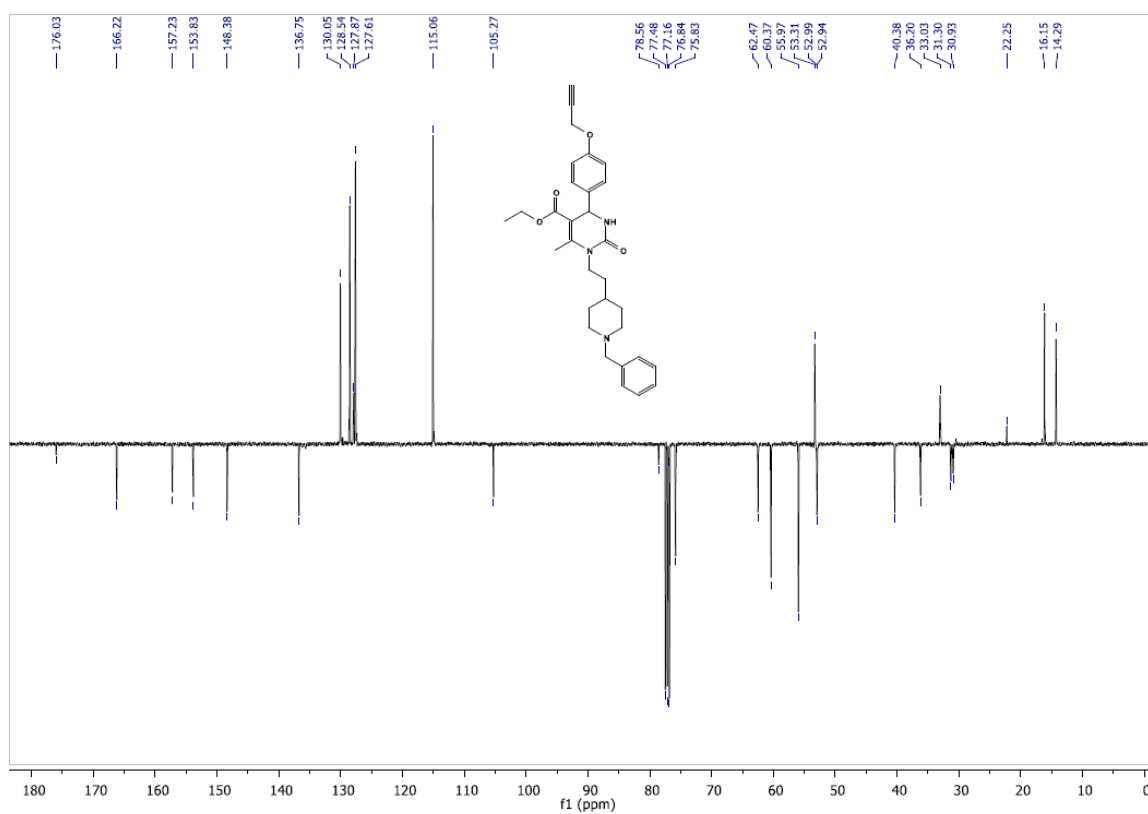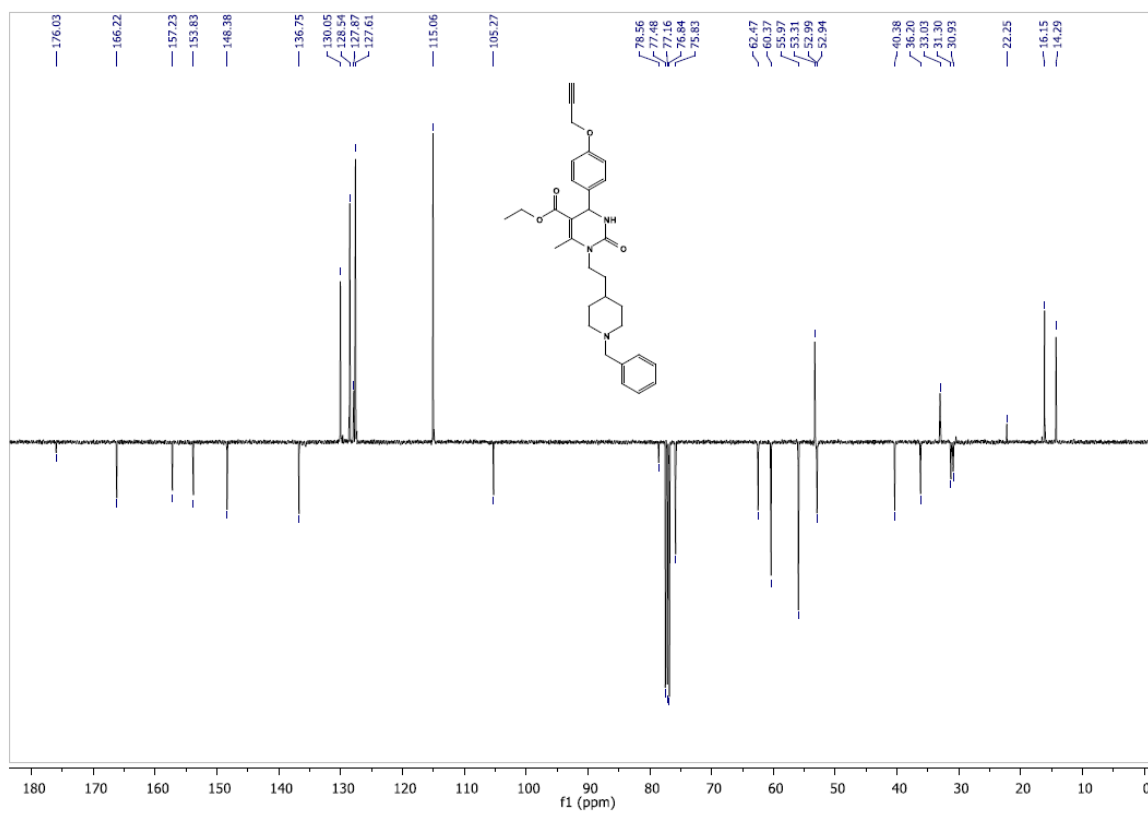

Figure S7:  $^1\text{H}$  NMR spectrum of compound 5b

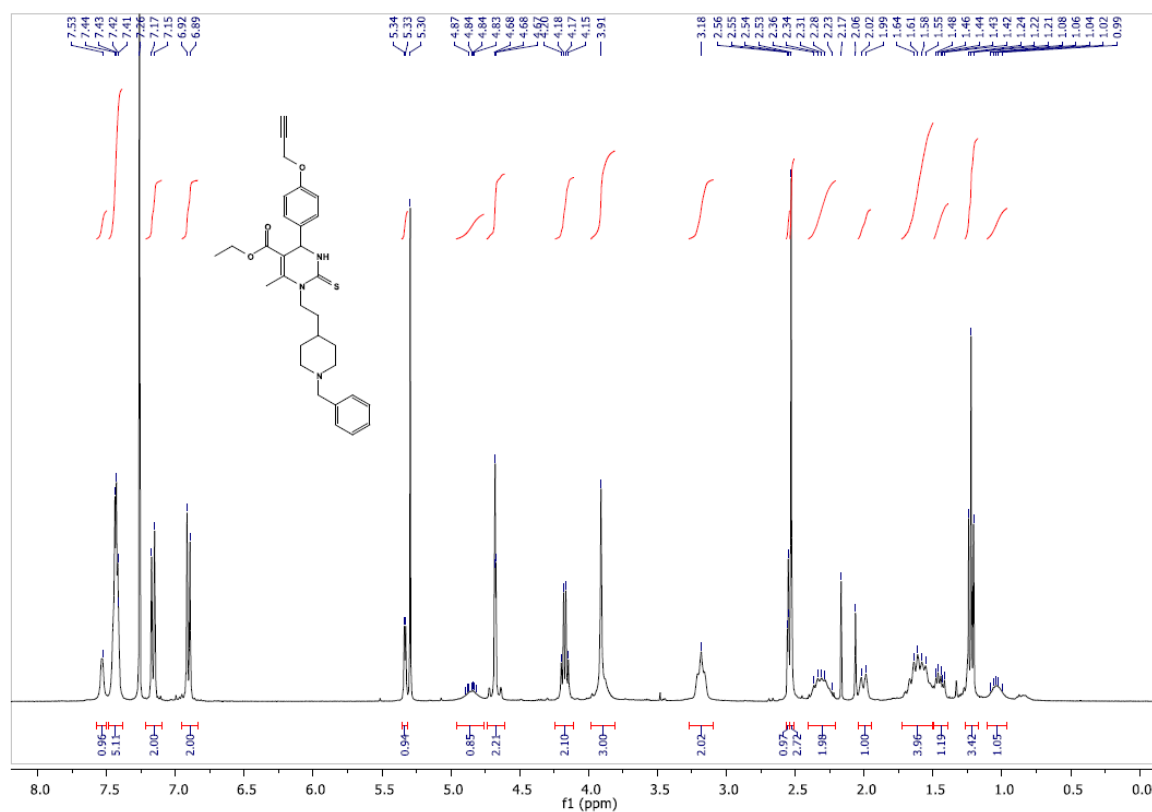

Figure S8:  $^{13}\text{C}$  NMR spectrum of compound 5b

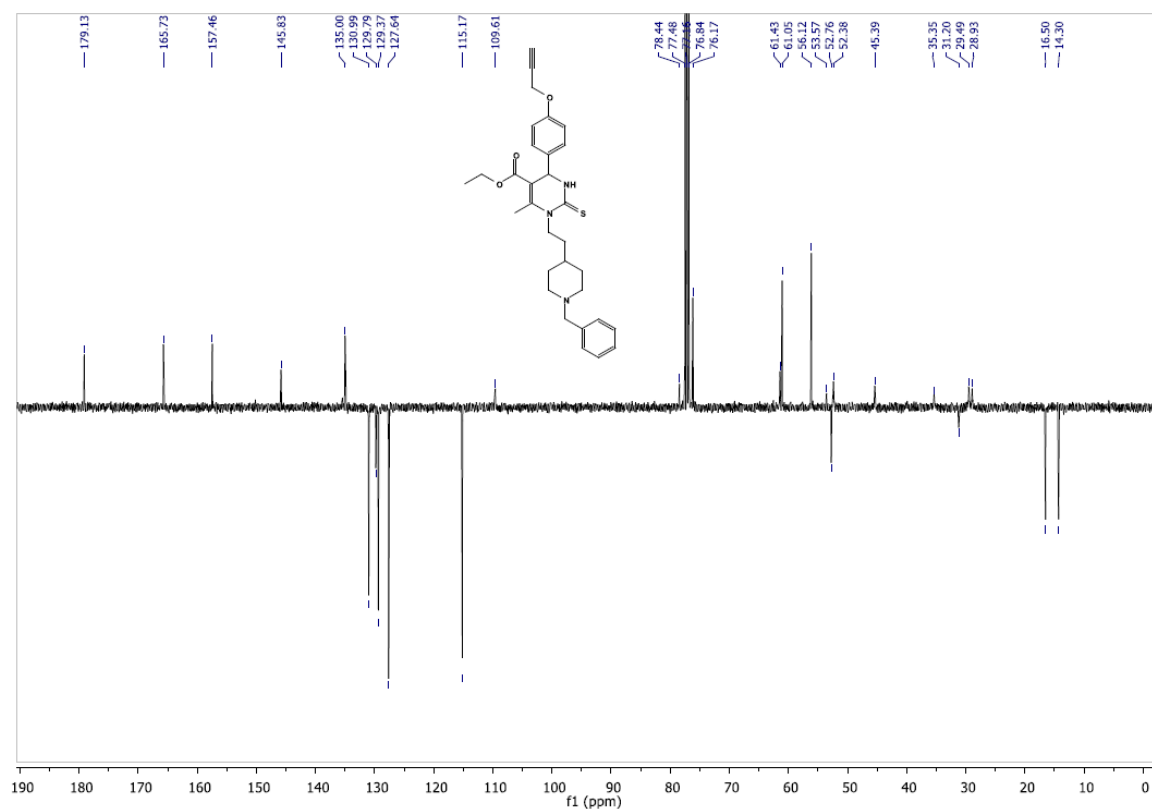

Figure S9:  $^1\text{H}$  NMR spectrum of compound 4c

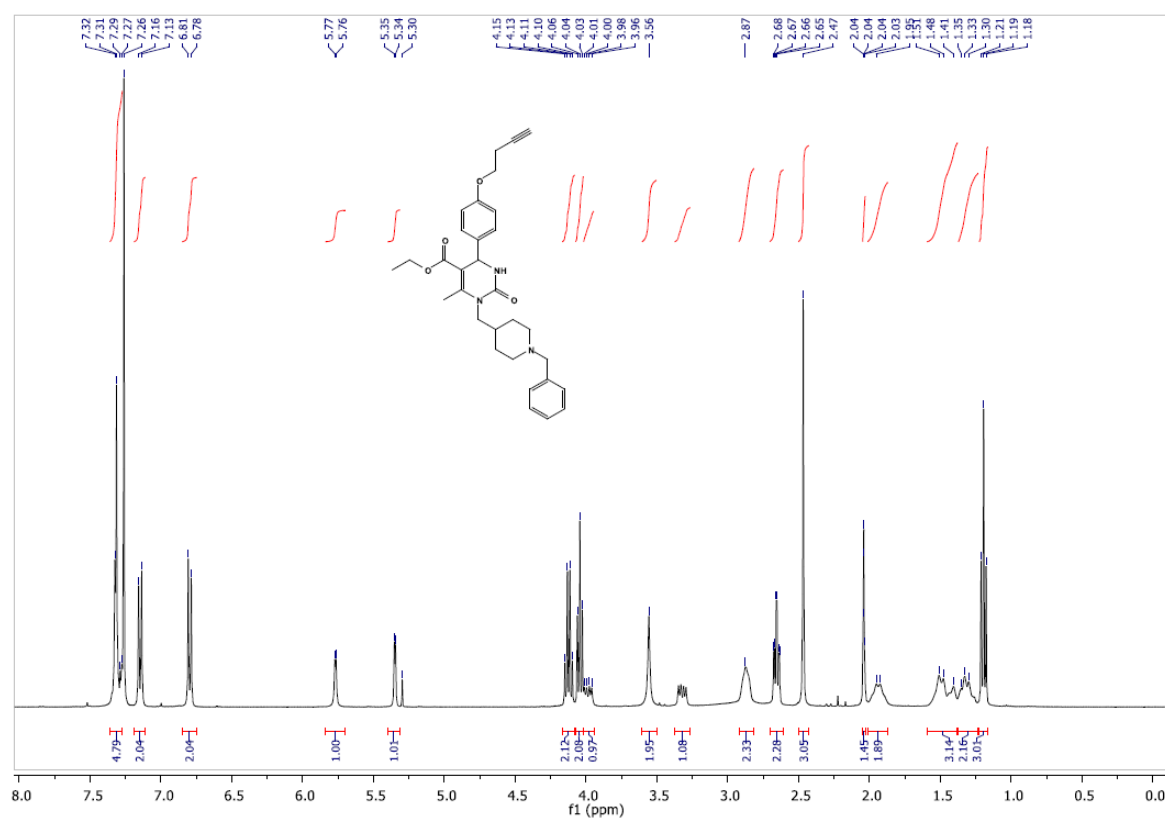

Figure S10:  $^{13}\text{C}$  NMR spectrum of compound 4c

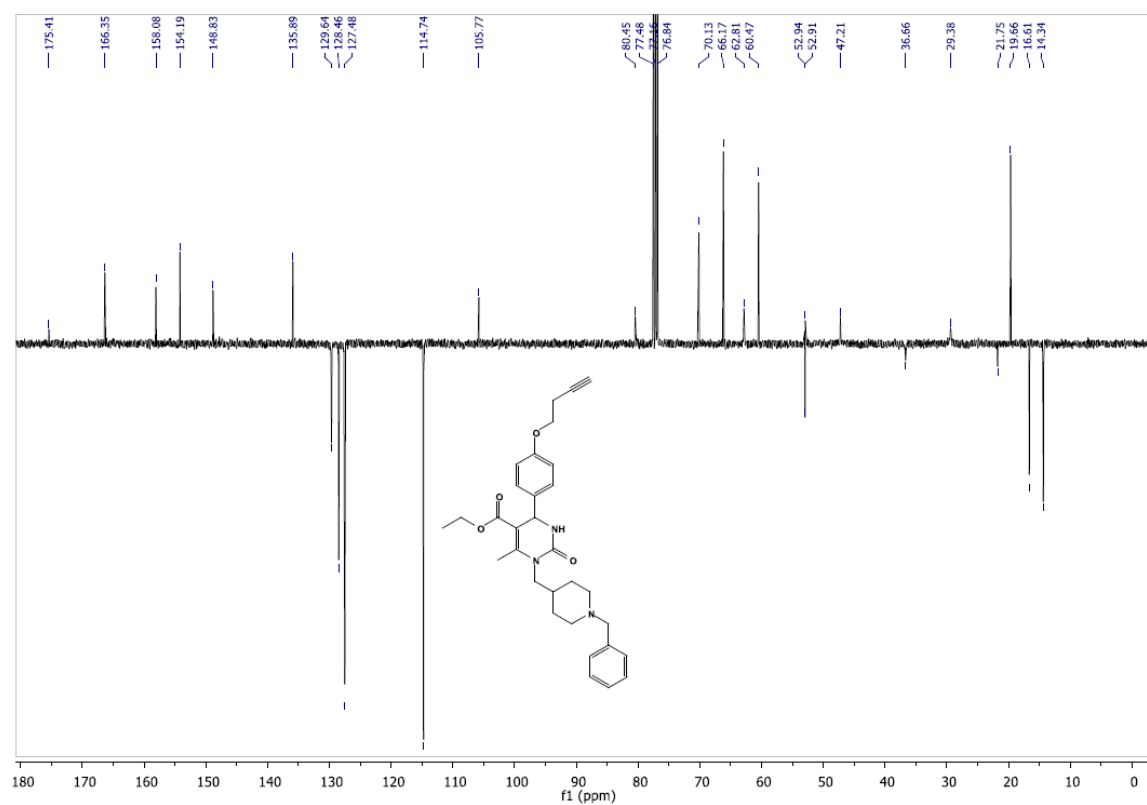

Figure S11:  $^1\text{H}$  NMR spectrum of compound 5c

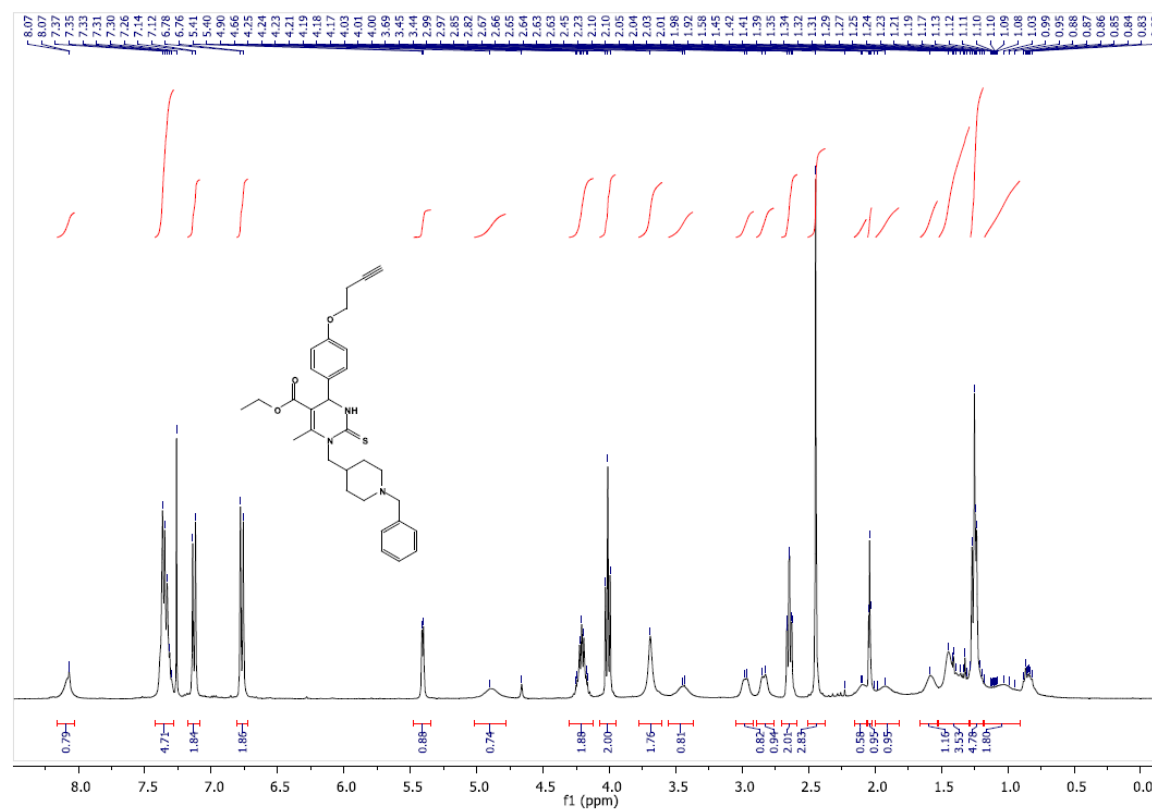

Figure S12:  $^{13}\text{C}$  NMR spectrum of compound 5c

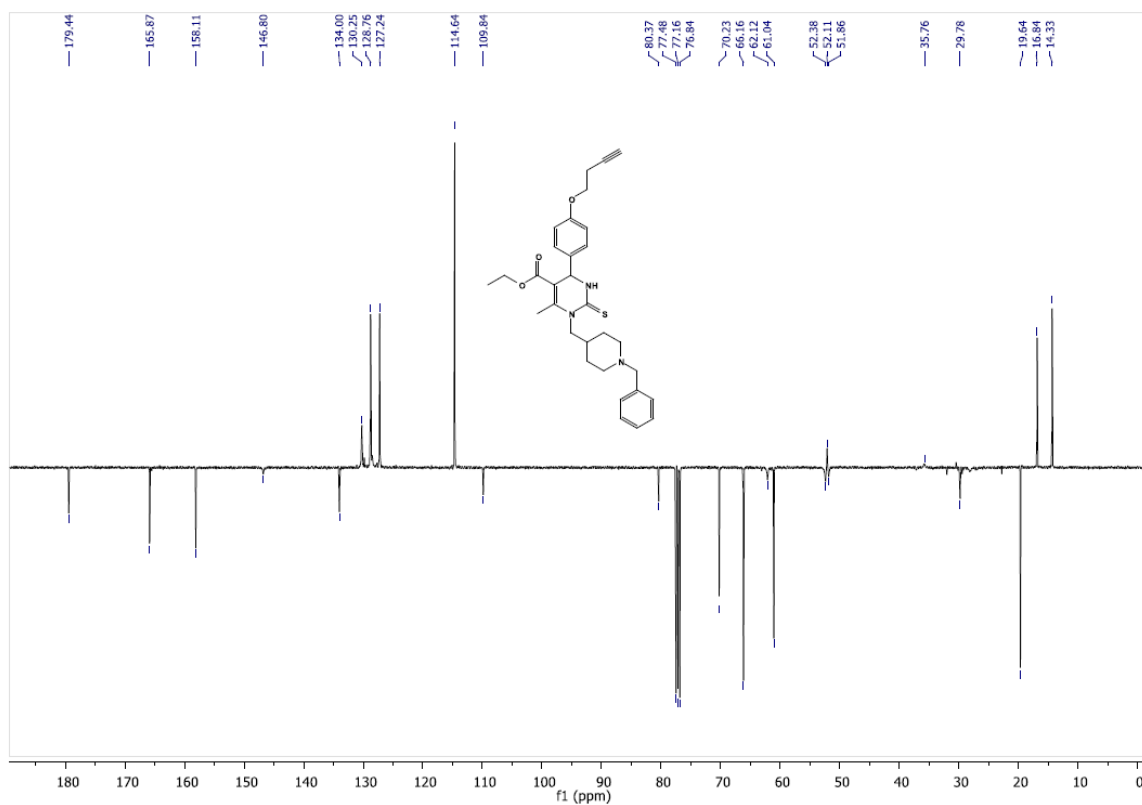



Figure S13:  $^1\text{H}$  NMR spectrum of compound 4d

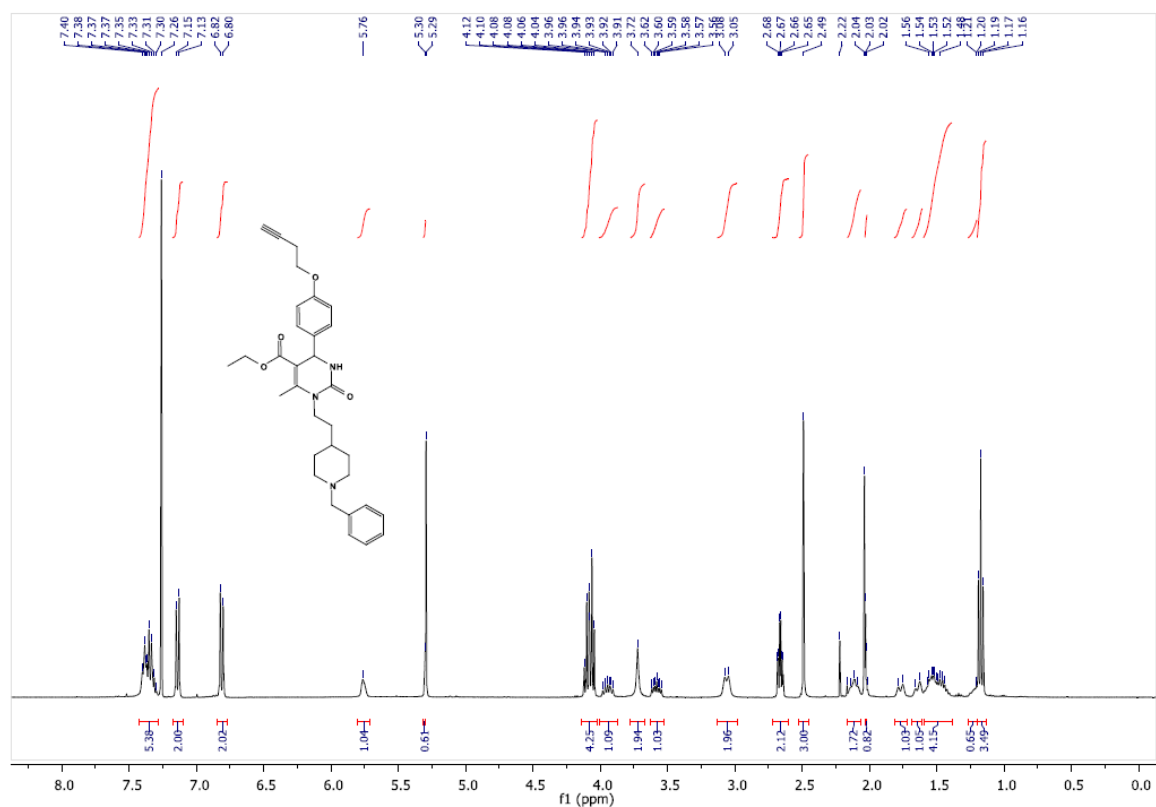

Figure S14:  $^{13}\text{C}$  NMR spectrum of compound 4d

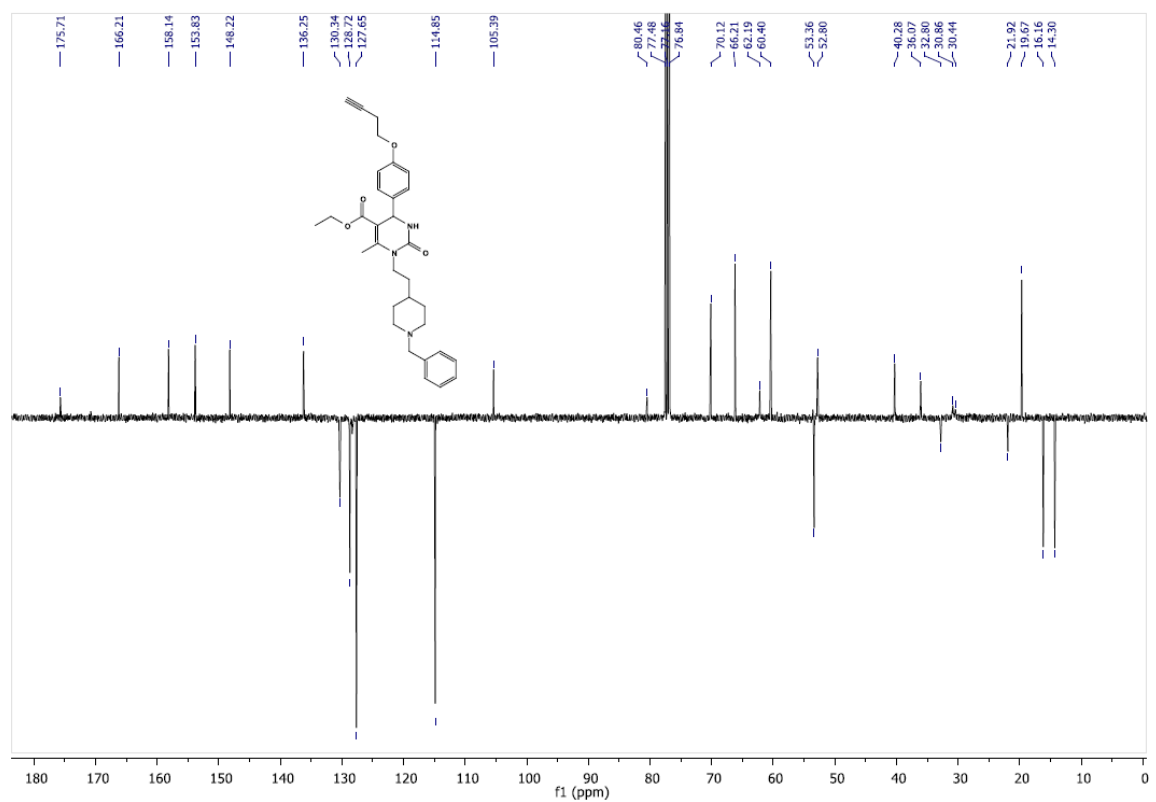

Figure S15:  $^1\text{H}$  NMR spectrum of compound 5d

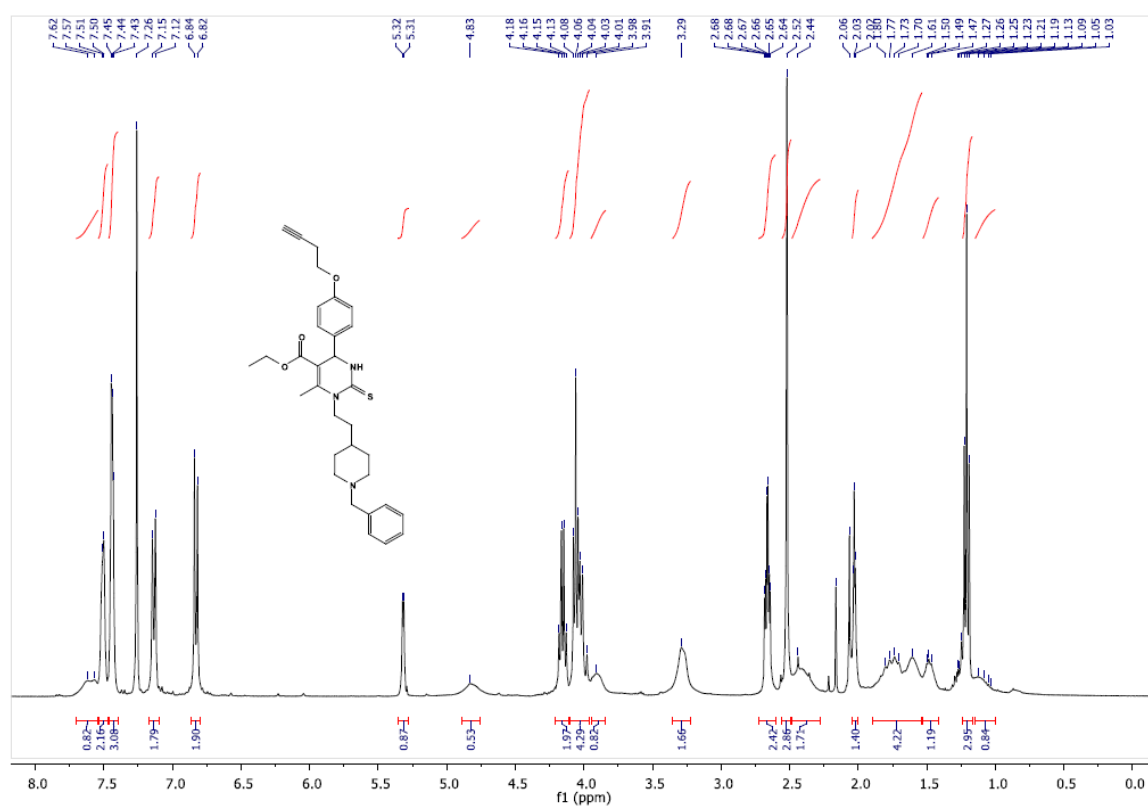

Figure S16:  $^{13}\text{C}$  NMR spectrum of compound 5d

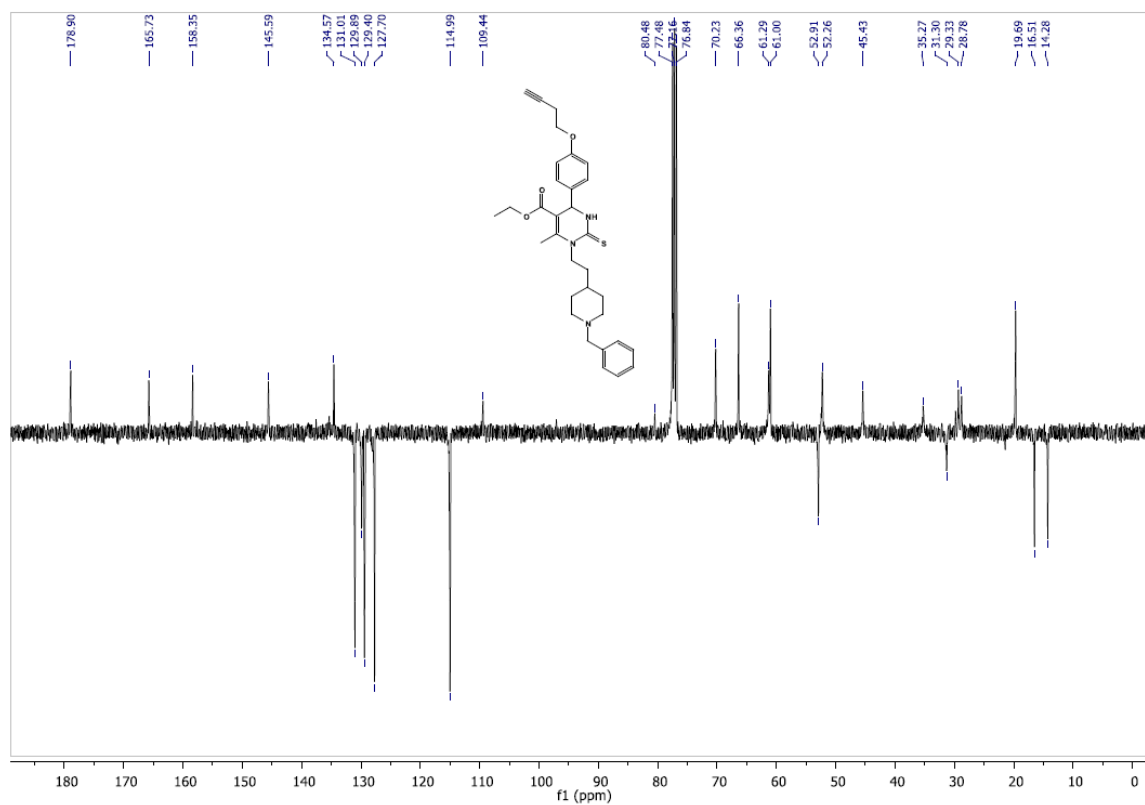

Supplement: s1 [file s1]
